# Supplementary material
Source: Elsevier journal article supplement (https://www.sciencedirect.com/science/article/pii/S2387020621005040)
Supplement: mmc2 [file S2387020621005040:mmc2.docx]

**Tabla S1:** Características basales de la muestral incluida,

| **Variable** |  |
| --- | --- |
| N (%) | 309 (100) |
| Edad (años) | 82,0 (77,0 – 86,1) |
| Género: (hombres[%]) | 153 (49,5) |
| Peso (Kgs) | 75,0 (65,0 – 83,5) |
| Altura (m) | 1,60 (1,53 – 1,68) |
| IMC (Kgs/m2) | 28,6 (25,2 – 33,2) |
| TAS (mmHg) | 135 (120 – 153) |
| TAD(mmHg) | 72 (63 – 82) |
| FC (l,p,m,) | 78 (67 – 93) |
| Signos de IC (n[%]): |  |
| - IY | 188 (62,5) |
| - Edemas | 242 (80,1) |
| - Crepitantes | 258 (83,5) |
| Parámetros ecocardiográficos: |  |
| - FEVI (%) | 55,7 (14,0) |
| - PAPs (mmHg) | 49,1 (15,4) |
| - Diámetro AI (mm) | 50,9 (9,7) |
| - Masa ventricular (g) | 127,2 (48,0) |
| - Líneas “b” ecográficas (presencia) | 129 (58,1) |
| - Dilatación VCI (≥ 50%) | 58 (50,0) |
| Clase funcional basal NYHA (n[%]): |  |
| - I | 33 (11,0) |
| - II | 188 (62,9) |
| - III | 77 (25,8) |
| - IV | 1 (0,3) |
| Antecedentes (n[%]): |  |
| - ICC | 214 (69,3) |
| - Hipertensión | 259 (83,8) |
| - Cardiopatía isquémica | 97 (31,4) |
| - Dislipemia | 141 (45,8) |
| - Diabetes | 126 (40,8) |
| - FA/Flutter | 182 (58,9) |
| - EPOC | 50 (16,2) |
| - ERC | 98 (31,8) |
| - Anemia | 77 (25,1) |
| - Portador marcapasos | 33 (10,7) |
| Tratamiento IC (n[%]): |  |
| - Diuréticos de asa | 266 (89,6) |
| - Betabloqueantes | 157 (72,1) |
| - IECAs/ARA II | 214 (69,3) |
| - BRM | 87 (29,5) |

*ARA II: Antagonistas de los receptores tipo II aldosterona; BRM: Bloqueantes de los receptores mineralocorticoides; EPOC: Enfermedad Pulmonar obstructiva crónica; ERC: Enfermedad renal crónica; FA: Fibrilación auricular; FC: Frecuencia cardíaca: FEVI: Fracción de eyección ventricular izquierda; ICC: Insuficiencia cardíaca crónica; IECA: Inhibidores de la enzima conversora de angiotensina; IMC: Indice de masa corporal; IY: ingurgitación yugular; NYHA: New York Heart Association; TAD: Tensión arterial diastólica; TAS: Tensión arterial sistólica; VCI: Vena cava inferior,*

| **Variable** |  |
| --- | --- |
| Biomarcadores |  |
| - NT-proBNP al ingreso (pg/mL) | 3400 (1915 – 7151) |
| - NT-proBNP al alta (pg/mL) | 2217 (917 – 3910) |
| - CA125 al ingreso (mU/mL) | 55,2 (23,8 – 116,8) |
| - CA125 al alta (mU/mL) | 62,5 (24,8 – 147,2) |
| Análisis indirecto del volumen plasmático |  |
| - Volumen plasmático real (mL) | 2866 (2499 – 2177) |
| - Volumen plasmático ideal (mL) | 2925 (2566 – 3320) |
| - VPr (%) | -3,1 (-11,0 – 3,7) |
| Parámetros de función renal |  |
| - Cistatina al ingreso (mg/mL) | 1,47 (1,20 – 1,94) |
| - FGe por cistatina (mL/min/1,73m2) | 44,7 (30,9 – 58,2) |
| - Urea al ingreso(g/dL) | 0,58 (0,42 – 0,78) |
| - Creatinine al ingreso(mg/dL) | 1,15 (0,88 – 1,49) |
| Parámetros analíticos al ingreso: |  |
| - Ácido úrico (mg/dL) | 7,77 (2,53) |
| - Sodio (mmol/L) | 141 (139 – 143) |
| - Potasio (mmol/L) | 4,13 (0,61) |
| - Proteínas totales (g/L) | 6,46 (0,66) |
| - Albúmina (g/dL) | 3,16 (2,71 – 3,40) |
| - Colesterol total (mg/dL) | 138 (115 – 161) |
| - Triglicéridos (mg/dL) | 86 (69 – 111) |
| - Hemoglobina (g/L) | 11,7 (1,9) |
| - Hematocrito (%) | 35,8 (5,8) |
| - ADE (%) | 15,6 (14,7 – 17,1) |
| - Linfocitos(mm3/mL) | 1000 (700 – 1500) |
| - IST (%) | 12,9 (9,0 – 22,6) |
| - Ferritina (ng/mL) | 84 (46,5 – 165) |
| Análisis del estado nutricional: |  |
| - Indice de CONUT (puntuación total) | 6 (4 – 7) |
| - Grupos según CONUT (n[%]) |  |
| - - Normal | 13 (4,2) |
| - - Ligero | 89 (28,8) |
| - - Moderado | 170 (55,0) |
| - - Severo | 37 (12,0) |
| - Indice PNI (puntuación total) | 36,5 (32,5 – 40,5) |
| - Grupos PNI (n[%]) |  |
| - - Normal | 117 (37,9) |
| - - Moderado | 83 (26,9) |
| - - Severo | 109 (35,3) |
| Objetivo primario (n[%]) |  |
| - Muerte para todas las causas a 1 año | 78 (26,0) |

*ADE: ancho de distribución eritrocitaria; CA125: Antígeno del cáncer 125; CONUT: Controlling nutritional status; FGe: Filtrado glomerular estimado; IST: Indice de saturación de la transferrina; PNI: Prognostic nutritional index; VPr: Volumen plasmático relativo,*
