# Supplementary material
Source: Elsevier journal article supplement (https://www.sciencedirect.com/science/article/pii/S2387020621005040)
Supplement: mmc3 [file S2387020621005040:mmc3.docx]

**Tabla suplementaria S2:** Análisis completo univariante y multivariante de regresión de COX para el objetivo primario de muerte por todas las causas tras el año posterior al ingreso.

| **Variable** | **HR (IC 95%)** | **P-valor** | **Variable** | **HR (IC 95%)** | **P-valor** |
| --- | --- | --- | --- | --- | --- |
| Edad (años)* | 1.75 (1.28 – 2.41) | **< 0.001** |  |  |  |
| TAS (mmHg)* | 0.77 (0.62 – 0.97) | **0.023** | TAS(mmHg)* | 1.45 (0.96 – 2.20) | 0.081 |
| TAD (mmHg)* | 0.83 (0.68 – 1.03) | 0.091 |  |  |  |
| FC (l.p.m.)* | 1.16 (0.94 – 1.44) | 0.177 |  |  |  |
| IY | 1.45 (0.89 – 2.38) | 0.135 |  |  |  |
| edemas | 1.76 (0.91 – 3.43) | 0.096 |  |  |  |
| Líneas “b” ecográficas (presence) | 1.78 (0.99 – 3.21) | 0.055 |  |  |  |
| Clase functional basal NYHA | 1.81 (1.24 – 2.64) | **0.002** |  |  |  |
| ERC | 1.78 (1.13 – 2.79) | **0.012** |  |  |  |
| Anemia | 1.62 (1.01 – 2.59) | **0.045** |  |  |  |
| Uso de diuréticos de asa | 2.66 (0.84 – 8.46) | 0.097 |  |  |  |
| Tratamiento betabloqueante | 0.53 (0.33 – 0.86) | **0.010** |  |  |  |
| Tratamiento con IECAs/ARA II | 0.62 (0.38 – 1.00) | **0.050** |  |  |  |
| NT-proBNP al ingreso (pg/mL)* | 2.11 (1.63 – 2.73) | **< 0.001** |  |  |  |
| NT-proBNP al alta (pg/mL)* | 1.76 (1.34 – 2.30) | **< 0.001** |  |  |  |
| CA125 al ingreso (mU/mL)* | 1.38 (1.07 – 1.79) | **0.014** |  |  |  |
| CA125 al alta (mU/mL)* | 1.57 (1.17 – 2.10) | **0.003** |  |  |  |
| VPr (%)* | 1.05 (0.63 – 1.75) | 0.844 |  |  |  |
| Cistatina al ingreso (mg/mL)* | 1.58 (1.21 – 2.07) | **0.001** |  |  |  |
| Urea al ingreso (g/dL)* | 1.72 (1.38 – 2.14) | **< 0.001** |  |  |  |
| Creatinina al ingreso (mg/dL)* | 1.50 (1.22 – 1.86) | **< 0.001** |  |  |  |
| Ácido úrico (mg/dL) | 1.20 (1.11 – 1.31) | **< 0.001** | Ácido úrico (mg/dL) | 1.24 (1.07 – 1.45) | **0.006** |
| Sodio (mmol/L)* | 0.82 (0.67 – 1.00) | 0.053 |  |  |  |
| Triglicéridos(mg/dL)* | 0.78 (0.61 – 1.00) | 0.054 |  |  |  |
| Hemoglobina (g/L) | 0.86 (0.77 – 0.96) | **0.009** |  |  |  |
| Hematocrito (%) | 0.94 (0.91 – 0.97) | **0.001** | Hematocrito (%) | 0.90 (0.83 – 0.99) | **0.023** |
| ADE (%)* | 1.13 (0.96 – 1.31) | 0.153 |  |  |  |
| Ferritina (ng/mL)* | 1.53 (1.14 – 2.06) | **0.005** | Ferritina (ng/mL)* | 1.89 (1.19 – 3.00) | **0.007** |
| Índice de CONUT (total score)* | 1.62 (1.22 – 2.14) | **0.001** |  |  |  |
| Índice PNI(total score)* | 0.65 (0.53 – 0.80) | **< 0.001** |  |  |  |

** Las variables se han transformado mediante rangos logaritmicos y tipificadas de la siguiente manera: [LN (variable)-media/D.E.].*
