# Supplementary material
Source: Elsevier journal article supplement (https://www.sciencedirect.com/science/article/pii/S2387020621005040)
Supplement: mmc4 [file S2387020621005040:mmc4.docx]

**Tabla S3:** Etiología de las muertes producidas durante el año de seguimiento.

| **Variable (n[%])** | **N** |
| --- | --- |
| Muertes totales | 91(24,1) |
| Muertes de origen cardiovascular | 76 (19,9) |
| Muertes producidas por procesos infecciosos o neoplasias malignas | 13 (14,3) |
| Otros | 2 (2,2) |
