# Supplementary material
Source: Elsevier journal article supplement (https://www.sciencedirect.com/science/article/pii/S2387020621005040)
Supplement: mmc5 [file S2387020621005040:mmc5.docx]

| **UNIVARIABLE** | | | **MULTIVARIABLE**** | | |
| --- | --- | --- | --- | --- | --- |
| **Variable** | **HR (IC 95%)** | **P-valor** | **Variable** | **HR (IC 95%)** | **P-valor** |
| Edad (años)* | 2,10 (1,49 – 2,.96) | **< 0,001** |  |  |  |
| TAS (mmHg)* | 0,79 (0,64 – 0,98) | **0,035** |  |  |  |
| Clase functional basal (NYHA) | 2,68 (1,83 – 3,95) | **< 0,001** |  |  |  |
| ERC | 1,71 (1,08 – 2,71) | **0,021** |  |  |  |
| Anemia | 1,61 (0,99 – 2,60) | 0,053 |  |  |  |
| Tratamiento betabloaqueante | 0,65 (0,40 – 1,05) | 0,078 |  |  |  |
| Tratamiento con IECA/ARA II | 0,58 (0,36 – 0,94) | **0,028** |  |  |  |
| NT-proBNP al ingreso (pg/mL)* | 1,97 (1,54 – 2,53) | **< 0,001** |  |  |  |
| NT-proBNP al alta (pg/mL)* | 1,83 (1,38 – 2,41) | **< 0,001** |  |  |  |
| CA125 al ingreso (mU/mL)* | 1,54 (1,17 – 2,03) | **0,002** |  |  |  |
| CA125 al alta (mU/mL)* | 1,61 (1,19 – 2,22) | **0,002** |  |  |  |
| Cistatina al ingreso (mg/mL)* | 1,67 (1,28 – 2.20) | **0,001** |  |  |  |
| Urea al ingreso (g/dL)* | 1,80 (1,43 – 2,25) | **< 0,001** |  |  |  |
| Creatinina al ingreso (mg/dL)* | 1,54 (1,24 – 1,91) | **< 0,001** |  |  |  |
| Ácido úrico (mg/dL) | 1,21 (1,11 – 1,31) | **< 0,001** |  |  |  |
| Hemoglobina (g/L) | 0,84 (0,75 – 0,95) | **0,004** |  |  |  |
| Hematocrito (%) | 0,95 (0,91 – 0,98) | **0,002** |  |  |  |
| Ferritina (ng/mL)* | 1,15 (0,85 – 1,56) | 0,362 |  |  |  |
| Indice de CONUT (total score)* | 1,51 (1,13 – 2,02) | **0,006** |  |  |  |
| Indice PNI (total score)* | 0,67 (0,53 – 0,84) | **0,001** |  |  |  |

**Tabla S4:** Análisis univariante y multivariante mediante regresión de COX para el objetivo primario de muerte cardiovascular al año del ingreso

** Las variables se han transformado mediante rangos logaritmicos y tipificadas de la siguiente manera: [LN (variable)-media/D.E.].*

**** *Lista de variables incluídos para el ajuste en el análisis multivariante: edad, TAS, Clase functional basal (NYHA), Historia de ERC (eGFR < 60mL/min/1.73m2), Historia de anemia, tratamiento con betabloaqueantes, Tratamiento con IECAs/ARA II,, NT proBNP al ijngreso, NTproBNP al alta, CA125 al ingreso, CA125 al alta, Cystatin al ingreso, Creatinine al ingreso, Ácido úrico al ingreso, Hemoglobina al ingreso, Hematocrito al ingreso, Ferritina al ingreso, Índice de CONUT (Controlling nutritional status) al ingreso e índice PNI (Prognostic nutritional index) al ingreso.*
